# Supplementary material for: Hepatitis E Virus in People Who Use Crack-Cocaine: A Cross-Sectional Study in a Remote Region of Northern Brazil
Source: MDPI journal article supplement (doi:10.3390/v13050926), 2021-05-17
Supplement: s1 [file s1]

### Description of extra procedure used in this study.

Isolation of viral RNA from stool using the QIAamp® Viral RNA Mini Kit.

Please be sure to read the QIAamp® Viral RNA Mini Kit Handbook (Qiagen) carefully before beginning this procedure.

Step by step:

1. Suspend 0.5 - 1.0 ml stool in up to 5 ml of 0.89% NaCl (i.e., up to 1:10 dilution).
2. Clarify the solution by centrifugation for 20 min at 4000 × g.
3. Filter the supernatant using a 0.22 µm filter.
4. Use 140 µl of the filtrate as starting material following the Viral RNA Mini Spin Protocol or the Viral RNA Mini Vacuum Protocol in the QIAamp Viral RNA Mini Kit Handbook.

For more details, visit:  
<https://www.qiagen.com/us/resources/resourcedetail?id=cee75d34-6d1f-4f44-9039-9597b708e6a2&lang=en>

**Table S1.** Nucleotide sequences (from the 5' terminal region of ORF1 (255 nt)) of hepatitis E virus and other information used to reconstruct the maximum likelihood phylogenetic tree presented in this study.

| Genotype/subtype | GenBank access number (HEV host)                                                    | Evolutionary model |
|------------------|-------------------------------------------------------------------------------------|--------------------|
| 1                | LC061267 (Dromedary camel), NC_001434 (Monkey)                                      | GTR + G *          |
| 2a               | M74506 (Man)                                                                        |                    |
| 3a               | AB089824 (Man), AB074920 (Man), AB082552 (Man), AF060668 (Swine)                    |                    |
| 3b               | AB189072 (Man), AB443626 (Swine), FJ527832 (Swine), AB189071 (Deer), AB091394 (Man) |                    |
| 3c               | EF591852 (Swine), EF591853 (Swine), HM154537 Swine), JN983199 (Man), JN983203 (Man) |                    |
| 3e               | AJ315768 (Man), AF110389 (Man), FJ998015 (Boar)                                     |                    |
| 3f               | AB369687 (Man), AF336005 (Swine)                                                    |                    |
| 4                | AB220977 (Man), AB220978 (Man), AB220979 (Man)                                      |                    |

\* Akaike information criteria.

**Table S2.** Factors not associated with hepatitis E virus exposure in people who use crack-cocaine in a remote region of northern Brazil.

| Factors                                                                                                   | Total | HEV + (%) | Bivariate OR (95% CI) | Multivariate OR (95% CI) |
|-----------------------------------------------------------------------------------------------------------|-------|-----------|-----------------------|--------------------------|
| Male <i>versus</i> (vs.) Female                                                                           | 314   | 59 (18.8) | 0.8 (0.4 - 1.5)       | 1.0 (0.6 - 2.0)          |
| Age $\geq$ 30 years <i>vs.</i> > 30 years                                                                 | 146   | 24 (16.4) | 0.8 (0.5 - 1.4)       | 1.2 (0.7 - 1.9)          |
| Non-white <i>vs.</i> White                                                                                | 389   | 76 (19.5) | 3.0 (0.9 - 10.2)      | 3.7 (0.8 - 9.8)          |
| Single, separated or widowed <i>vs.</i> Married or cohabitating <sup>†</sup>                              | 407   | 77 (18.9) | 3.2 (0.7 - 13.0)      | 3.4 (0.6 - 13.7)         |
| Up to elementary school <i>vs.</i> High school or more                                                    | 353   | 67 (19.0) | 1.4 (0.7 - 2.9)       | 2.1 (0.5 - 3.3)          |
| Heterosexual <i>vs.</i> Same sex (including bisexual)                                                     | 396   | 75 (18.9) | 2.0 (0.7 - 6.1)       | 1.8 (0.6 - 4.5)          |
| Unprotected sex <i>vs.</i> Protected sex <sup>†</sup>                                                     | 396   | 76 (19.2) | 3.0 (0.8 - 9.3)       | 3.5 (0.7 - 10.1)         |
| More than 10 sexual partners <i>vs.</i> Up to 10 sexual partners <sup>†</sup>                             | 189   | 31 (16.4) | 0.8 (0.4 - 1.4)       | 1.1 (0.5 - 1.7)          |
| Oral sex <i>vs.</i> No oral sex <sup>†</sup>                                                              | 281   | 47 (16.7) | 0.7 (0.4 - 1.3)       | 0.8 (0.5 - 1.8)          |
| Anal sex <i>vs.</i> No anal sex <sup>†</sup>                                                              | 157   | 32 (20.4) | 1.2 (0.7 - 2.1)       | 1.5 (0.8 - 3.0)          |
| Exchange of sex for money/illicit drug <i>vs.</i> No exchange of sex for money/illicit drugs <sup>†</sup> | 171   | 58 (33.9) | 1.1 (0.6 - 2.0)       | 1.4 (0.5 - 2.4)          |

<sup>†</sup>Last 12 months. OR: Odds Ratio. 95% CI: 95% confidence interval. OR: Odds Ratio.
